# Supplementary material for: Participation in Community Group Activities Among Older Adults: Is Diversity of Group Membership Associated With Better Self-rated Health?
Source: PubMed Central journal article supplement (PMC6192976; doi:10.2188/jea.je20170152), 2018-11-05
Supplement: je-28-452-s001.pdf [file je-28-452-s001.pdf]

**eTable 1.** Characteristics of those who completed the information on diversity and those who did not

| <b>Characteristics</b>       | <b>Incomplete</b> | <b>Complete</b> |
|------------------------------|-------------------|-----------------|
| Total, n (%)                 | 48,084 (100)      | 81,656 (100)    |
| Age, mean (SD)               | 75 (6)            | 74 (6)          |
| Women, n (%)                 | 28,168 (59)       | 41,450 (51)     |
| Self-rated health, n (%)     |                   |                 |
| Poor/fair                    | 8,610 (18)        | 14,571 (18)     |
| Good/excellent               | 37,173 (77)       | 64,881 (79)     |
| Missing                      | 2,301 (4.8)       | 2,204 (2.7)     |
| Current workers, n (%)       | 9,811 (20)        | 18,243 (22)     |
| Missing                      | 7,807 (16)        | 5,490 (6.7)     |
| Marital status, n (%)        |                   |                 |
| Married                      | 31,774 (66)       | 58,980 (72)     |
| Single                       | 2,318 (4.8)       | 1,192 (1.5)     |
| Widowed/divorced             | 12,646 (26)       | 18,770 (23)     |
| Others                       | 433 (0.9)         | 710 (0.9)       |
| Missing                      | 913 (1.9)         | 2,004 (2.5)     |
| Comorbidity of cancer, n (%) | 1,623 (3.4)       | 3,116 (3.8)     |

|                                           |             |             |
|-------------------------------------------|-------------|-------------|
| Comorbidity of cardiac disease, n (%)     | 5,069 (11)  | 8,579 (11)  |
| Comorbidity of stroke, n (%)              | 1,594 (3.3) | 2,642 (3.2) |
| Missing comorbidity, n (%)                | 4,119 (8.6) | 4,548 (5.6) |
| Equivalent annual household income, n (%) |             |             |
| <1.5 million yen                          | 12,202 (25) | 18,119 (22) |
| 1.5–2.4 million yen                       | 13,776 (29) | 28,383 (35) |
| ≥2.5 million yen                          | 9,197 (19)  | 21,970 (27) |
| Missing                                   | 12,909 (27) | 13,184 (17) |
| Educational attainment, n (%)             |             |             |
| <6 years                                  | 974 (2.0)   | 1,195 (1.5) |
| 6–9 years                                 | 21,406 (45) | 30,021 (37) |
| 10–12 years                               | 16,091 (33) | 31,199 (38) |
| ≥13 years                                 | 7,947 (17)  | 17,920 (22) |
| Missing                                   | 1,666 (3.5) | 1,321 (1.6) |

---

SD, standard deviation.

<sup>a</sup> The percentage may not total 100 because of rounding.

**eTable 2.** Sensitivity analysis of participants with complete data

| <b>Characteristics</b>       | <b>Prevalence ratio (95% CI)</b> |                |                  |                |
|------------------------------|----------------------------------|----------------|------------------|----------------|
|                              | <b>Model 1</b>                   | <b>P value</b> | <b>Model 2</b>   | <b>P value</b> |
| <b>Overall</b>               |                                  |                |                  |                |
| Diversity level (range, 0–4) | 1.03 (1.03–1.04)                 | <0.001         |                  |                |
| Diverse dimension            |                                  |                |                  |                |
| Gender                       |                                  |                | 1.08 (1.08–1.09) | <0.001         |
| Residential area             |                                  |                | 1.03 (1.02–1.04) | <0.001         |
| Age composition              |                                  |                | 1.00 (0.99–1.01) | 0.64           |
| <b>Stratified by groups</b>  |                                  |                |                  |                |
| <b>Sports group</b>          |                                  |                |                  |                |
| Diversity level (range, 0–4) | 1.04 (1.04–1.04)                 | <0.001         |                  |                |
| Diverse dimension            |                                  |                |                  |                |
| Gender                       |                                  |                | 1.12 (1.10–1.13) | <0.001         |
| Residential area             |                                  |                | 1.02 (1.00–1.04) | 0.01           |
| Age composition              |                                  |                | 1.01 (0.99–1.02) | 0.44           |
| <b>Hobby group</b>           |                                  |                |                  |                |
| Diversity level (range, 0–4) | 1.03 (1.03–1.04)                 | <0.001         |                  |                |
| Diverse dimension            |                                  |                |                  |                |
| Gender                       |                                  |                | 1.05 (1.04–1.07) | <0.001         |
| Residential area             |                                  |                | 1.05 (1.04–1.07) | <0.001         |

|                 |                  |      |
|-----------------|------------------|------|
| Age composition | 1.02 (1.00–1.03) | 0.06 |
|-----------------|------------------|------|

**Volunteer group**

|                              |                  |        |
|------------------------------|------------------|--------|
| Diversity level (range, 0–4) | 1.03 (1.03–1.04) | <0.001 |
|------------------------------|------------------|--------|

Diverse dimension

|        |                  |        |
|--------|------------------|--------|
| Gender | 1.12 (1.09–1.15) | <0.001 |
|--------|------------------|--------|

|                  |                  |      |
|------------------|------------------|------|
| Residential area | 1.02 (0.99–1.05) | 0.28 |
|------------------|------------------|------|

|                 |                  |      |
|-----------------|------------------|------|
| Age composition | 0.96 (0.93–1.00) | 0.04 |
|-----------------|------------------|------|

**Other group**

|                              |                  |        |
|------------------------------|------------------|--------|
| Diversity level (range, 0–4) | 1.03 (1.03–1.03) | <0.001 |
|------------------------------|------------------|--------|

Diverse dimension

|        |                  |        |
|--------|------------------|--------|
| Gender | 1.09 (1.08–1.11) | <0.001 |
|--------|------------------|--------|

|                  |                  |      |
|------------------|------------------|------|
| Residential area | 1.01 (0.99–1.03) | 0.29 |
|------------------|------------------|------|

|                 |                  |      |
|-----------------|------------------|------|
| Age composition | 0.99 (0.98–1.01) | 0.34 |
|-----------------|------------------|------|

---

CI, confidence interval.

<sup>a</sup> Prevalence ratios of the diversity level estimated by Poisson regression with robust variance, adjusted for age, gender, current workers, marital status, comorbidities, household income, educational attainment, and residential area.

<sup>b</sup> Prevalence ratios of each dimension of the diversity estimated by Poisson regression with robust variance, adjusted for age, gender, current workers, marital status, comorbidities, household income, educational attainment, and residential area.
